# Supplementary material for: Self-enhancement of droplet jumping velocity: the interaction of liquid bridge and surface texture
Source: Royal Society of Chemistry journal article supplement (doi:10.1039/c6ra22421k), 2016-01-01
Supplement: c6ra22421k4.pdf [file c6ra22421k4.pdf]

1 *Supplementary Information*

2

3                   **Self-enhancement of droplet jumping velocity:**  
4                   **The interaction of liquid bridge and surface texture**

5

6                   Kai Wang, Qianqing Liang, Rui Jiang, Yi Zheng, Zhong Lan, and Xuehu Ma<sup>1)</sup>

7 *State Key Laboratory of Fine Chemicals, Liaoning Provincial Key Laboratory of Clean*  
8 *Utilization of Chemical Resources, Institute of Chemical Engineering, Dalian University of*  
9 *Technology, Dalian 116024, China*

10

---

<sup>1)</sup> Author to whom correspondence should be addressed; electronic mail:  
xuehuma@dlut.edu.cn

## 1 S.1 Formula derivation

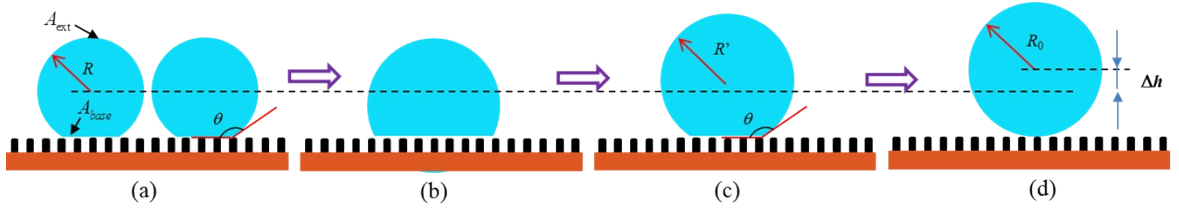

Fig. S1. Schematic of coalescence-induced droplet jumping on superhydrophobic surfaces.

2  
3 (1) The released surface energy  $\Delta E_s$

4 The surface energy of a droplet which is in the Cassie state on superhydrophobic  
5 surfaces can be given by<sup>1,2</sup>

$$6 \quad E_s = \sigma_{lv}A_{lv} + \sigma_{sl}A_{sl} + \sigma_{sv}A_{sv}, \quad (S1)$$

7 where  $\sigma$  is the interfacial energy,  $A$  is the interfacial area and the subscripts  $s$ ,  $l$ , and  $v$  denote  
8 the solid, liquid, and vapor, respectively. The solid-vapor contact area is given by

$$9 \quad A_{sv} = A_{total} - A_{sl}, \quad (S2)$$

10 where  $A_{total}$  is the surface area of the superhydrophobic surface.

11 The solid-liquid interfacial energy can be derived from Young's equation<sup>3</sup>

$$12 \quad \sigma_{sv} = \sigma_{sl} + \sigma_{lv} \cos \theta_Y, \quad (S3)$$

13 where  $\theta_Y$  is Young contact angle. Substituting Eq. (S2) and Eq. (S3) into Eq. (S1), we obtain

$$14 \quad E_s = \sigma_{lv}A_{lv} + \sigma_{sl}A_{sl} + \sigma_{sv}(A_{total} - A_{sl}) = \sigma_{lv}(A_{lv} - A_{sl} \cos \theta_Y) + \sigma_{sv}A_{total}. \quad (S4)$$

15 The total interfacial area  $A_{lv}$  and  $A_{sl}$  in Fig. S1a can be computed as follows:

$$16 \quad A_{lv} = 2 \times [A_{ext} + (1 - \varphi)A_{base}] = 2 \times [2\pi R^2(1 - \cos \theta) + \pi R^2 \sin^2 \theta(1 - \varphi)], \quad (S5)$$

$$17 \quad A_{sl} = 2 \times \varphi \times A_{base} = 2 \times (\pi R^2 \sin^2 \theta \varphi), \quad (S6)$$

18 where  $A_{ext}$  is surface area of external droplet surface,  $A_{base}$  is surface area of droplet base area,

19  $R$  is the droplet radius before coalescence,  $\theta$  is the apparent contact angle,  $\varphi$  is the solid-

20 liquid fraction.

1 Substituting Eq. (S5)-(S6) into Eq. (S4), we obtain the surface energy of droplets before  
 2 coalescence as shown in Fig. S1a:

$$3 \quad E_a = 2\sigma_{lv}\pi[2(1 - \cos \theta) + (1 - \varphi - \varphi \cos \theta_Y) \sin^2 \theta]R^2 + \sigma_{sv}A_{total} . \quad (S7)$$

4 In the same way, the surface energy of droplet after coalescence as shown in Fig. S1d is  
 5 given by

$$6 \quad E_d = 4\sigma_{lv}\pi R_0^2 + \sigma_{sv}A_{total} , \quad (S8)$$

7 where  $R_0$  is the droplet radius after coalescence.

8 Based on the law of mass conservation, we obtain

$$9 \quad R_0 = R \left( \frac{2 - 3 \cos \theta + \cos^3 \theta}{2} \right)^{1/3} . \quad (S9)$$

10 The released surface energy  $\Delta E_s$  before and after droplets coalesce on a flat SHS shown  
 11 in Fig. S1 can be given by

$$12 \quad \Delta E_s = E_a - E_d = 2\sigma_{lv}\pi[2(1 - \cos \theta) + (1 - \varphi - \varphi \cos \theta_Y) \sin^2 \theta - 2 \times \left( \frac{2 - 3 \cos \theta + \cos^3 \theta}{2} \right)^{2/3}]R^2 . \quad (S10)$$

13 (2) The viscous dissipation  $E_{vis}$

14 The viscous dissipation energy for each droplet can be estimated as<sup>4, 5</sup>

$$15 \quad E_{vis}^s = \int_0^{T_c} \int_{\Omega} \Phi d\Omega dt \approx \Phi \Omega T_c , \quad (S11)$$

16 in which  $\Phi$  is the dissipation function:

$$17 \quad \Phi = \frac{\mu}{2} \left( \frac{\partial v_i}{\partial x_j} + \frac{\partial v_j}{\partial x_i} \right)^2 \approx 12\mu \left( \frac{U}{R} \right)^2 , \quad (S12)$$

18  $\Omega$  is the volume of each droplet,  $\mu$  is the viscosity of the liquid, and  $T_c$  is the coalescence  
 19 time. The coalescence time is defined as time takes from the beginning of coalescence to the  
 20 merging of droplets into a spherical segment as shown in Fig. S1c. In Wang *et al.*'s study, the  
 21 coalescence time  $T_c$  is approximated to the characteristic capillary time scale  $\tau$  ,

$$T_c \approx \tau = \sqrt{\frac{\rho R^3}{\sigma_{lv}}} \quad (S13)$$

1  
2 As the coalescence starts, the capillary pressure inside the droplet ( $\Delta P = \frac{2\sigma_{lv}}{R}$ ) will  
3 accelerate the droplet along the horizontal direction. Thus, the average velocity  $U$  of each  
4 droplet can be obtained as

$$U \approx \tau \cdot \Delta P \cdot \pi R^2 \frac{1}{4\rho\pi R^3 / 3} = \frac{3}{2} \sqrt{\frac{\sigma_{lv}}{\rho R}} \quad (S14)$$

5  
6 Substituting Eq.(S12)-(S14) in to Eq.(S11), we obtain

$$E_{vis}^s \approx 36\pi\mu \sqrt{\frac{\sigma_{lv} R^3}{\rho}} \quad (S15)$$

7  
8 So, the total viscous dissipation energy during droplet coalescence can be estimated as<sup>5</sup>

$$E_{vis} = 2E_{vis}^s \approx 72\pi\mu \sqrt{\frac{\sigma_{lv} R^3}{\rho}} \quad (S16)$$

9  
10 (3) The work of adhesion  $E_{ad}$

11 The work of adhesion  $E_{ad}$  can be estimated by the Young-Dupré Equation,<sup>6</sup>

$$E_{ad} = A_{sl}(1 + \cos \theta_Y) \sigma_{lv} \quad (S17)$$

12  
13 The solid-liquid contact area of the merged droplet shown in Fig. S1c is defined as

14  $A_{sl} = \varphi A_{base} = \sqrt[3]{4\pi R^2 \sin^2 \theta \varphi}$ . So, we can get work of adhesion  $E_{ad}$

$$E_{ad} = \sqrt[3]{4\pi} (1 + \cos \theta_Y) \sigma_{lv} \varphi \sin^2 \theta R^2 \quad (S18)$$

15  
16 (4) The increased gravity potential energy  $\Delta E_h$

17 The height of the center of gravity of the droplet in Fig. S1a can be given by

$$h_1 = \frac{R(3 + \cos \theta)(1 - \cos \theta)}{4(2 + \cos \theta)} \quad (S19)$$

18  
19 The height of the center of gravity of the droplet in Fig. S1d can be given by

$$h_2 = R_0 = R \left( \frac{2 - 3 \cos \theta + \cos^3 \theta}{2} \right)^{1/3} \quad (S20)$$

$\Delta E_h$  is the gravity potential energy increase which is given by

$$\Delta E_h = mg(h_2 - h_1) = \frac{4}{3} \pi R^4 \rho g \left[ \left( \frac{2 - 3 \cos \theta + \cos^3 \theta}{2} \right)^{1/3} - \frac{(3 + \cos \theta)(1 - \cos \theta)}{4(2 + \cos \theta)} \right] \quad (S21)$$

## S.2 Supplementary Video

### Description:

**Video S1 (S1.avi, 245KB, for Fig. 3b).** Side-view imaging of the coalescence-induced droplet jumping on flat SHSs with only nanostructures. The video was captured at 15000 fps and played back at 3000fps.

**Video S2 (S2.avi, 208KB, for Fig. 5a).** Side-view imaging of the coalescence-induced droplet jumping on SHSs with a rectangular groove configuration. The video was captured at 12000 fps and played back at 3000fps.

**Video S3 (S3.avi, 265KB, for Fig. 5b).** Side-view imaging of the coalescence-induced droplet jumping on SHSs with a triangular prism configuration. The video was captured at 15000 fps and played back at 3000fps.

### References

1. A. Marmur, *Langmuir*, 2003, 19, 8343-8348.
2. N. A. Patankar, *Langmuir*, 2004, 20, 7097-7102.
3. T. Young, *Philos. Trans. R. Soc. London*, 1805, 95, 65-87.
4. S. Chandra and C. T. Avedisian, *Proc. R. Soc. London, Ser. A*, 1991, 432, 13-41.
5. F.-C. Wang, F. Yang and Y.-P. Zhao, *Appl. Phys. Lett.*, 2011, 98, 053112.
6. C. Lv, P. Hao, Z. Yao, Y. Song, X. Zhang and F. He, *Appl. Phys. Lett.*, 2013, 103, 021601.
